# Supplementary material for: Desmoglein-2 related Arrhythmogenic Cardiomyopathy: Integrative Genomic and Literature-based analysis with an Italian cohort-Level Validation
Source: Research Square preprint supplement (doi:10.21203/rs.3.rs-6957155/v1), 2025-08-27
Supplement: Supplementary file 1 [file 3998d13a8b42ea72c5d08869.xlsx]

## Sheet: Homozygous
	cDNAcoordinate	Proteincoordinate	Typeofvariant	Exon	Domain	Proteineffect	ACMGClass	Points	Criteria	Reference
Homozygous	c.2358delA	p.(Asp787Metfs*21)	Deletion	15	CytoplasmicDomain(ICS)	Frameshift	P	10	PVS1(VerySt)PM2(Sup)PP5(Sup)	36843528
	c.889G>A	p.(Asp297Asn)	Missense	8	Extracellulardomain(EC3)		VUS	4	PP3(St)PM2(Sup)BP1(Sup)	20031616
	c.1592T>G	p.(Phe531Cys)	Missense	11	Extracellularanchordomain(EA)		LP	6	PP3(St)PP5(Mo)PM2(Sup)BP1(Sup)	31645976
	c.1003A>G	p.(Thr335Ala)	Missense	8	Extracellulardomain(EC3)		LB	-2	BP4(Mo)BP1(Sup)BP6(Sup)PM2(Sup)PP5(Sup)	28818065
	c.1003A>G	p.(Thr335Ala)	Missense	8	Extracellulardomain(EC3)		LB	-2	BP4(Mo)BP1(Sup)BP6(Sup)PM2(Sup)PP5(Sup)	23381804
	c.1592T>G	p.(Phe531Cys)	Missense	11	Extracellularanchordomain(EA)		LP	6	PP3(St)PP5(Mo)PM2(Sup)BP1(Sup)	28578331	referencedi30129429
	c.1592T>G	p.(Phe531Cys)	Missense	11	Extracellularanchordomain(EA)		LP	6	PP3(St)PP5(Mo)PM2(Sup)BP1(Sup)	REF18	referencedi30129429
	c.1481A>C	p.(Asp494Ala)	Missense	11	Extracellulardomain(EC4)		VUS	3	PP3(Mo)PP5(Mo)PM2(Sup)BP1(Sup)BP6(Sup)	29178656
	c.874C>T	p.(Arg292Cys)	Missense	8	Extracellulardomain(EC3)		VUS	2	PP3(Mo)PM2(Sup)BP1(Sup)	29178656
	c.1592T>G	p.(Phe531Cys)	Missense	11	Extracellularanchordomain(EA)		LP	6	PP3(St)PP5(Mo)PM2(Sup)BP1(Sup)	24238504
	c.874C>T	p.(Arg292Cys)	Missense	8	Extracellulardomain(EC3)		VUS	2	PP3(Mo)PM2(Sup)BP1(Sup)	22000064
	c.1003A>G	p.(Thr335Ala)	Missense	8	Extracellulardomain(EC3)		LB	-2	BP4(Mo)BP1(Sup)BP6(Sup)PM2(Sup)PP5(Sup)	30790397
	c.2158G>T	p.(Glu720X)	Nonsense	14	CytoplasmicDomain(ICS)		LP	9	PVS1(VerySt)PM2(Sup)
	c.2499_2500delCAinsT	p.(Lys834ArgfsX3)	Deletion	15	CytoplasmicDomain(ICS)	Frameshift	P	10	PVS1(VerySt)PM2(Sup)PP5(Sup)
primavoltainomozigosi	c.1592T>G	p.(Phe531Cys)	Missense	11	Extracellularanchordomain(EA)		LP	6	PP3(St)PP5(Mo)PM2(Sup)BP1(Sup)	30391969

## Sheet: List of DSG2 variants in litera
	Supplementary tabel S2: List of DSG2 variants found in literature
cDNA coordinate	Protein coordinate	Type of variant	Domain	ACMG Class	Points	Criteria	Zygosity	PubMed identifiers (PMIDs)
c.1-317G>A	p.?	Splicing site	Pro-peptide (Pro)	VUS	1	PM2(Moderate) BP7(Supporting)	Heterozygous	31051180
c.1-1386C>A	p.?	Splicing site	Pro-peptide (Pro)	B	-13	BA1(Stand Alone) BS2(Strong) BP7(Supporting)	Heterozygous	31051180
c.3G>C	p.(Met1Ile)	Start Loss	Pro-peptide (Pro)	P	11	PVS1 (Very Strong) PM2 (Moderate)	Heterozygous; Digenic	17105751 / 22036071 / 21606390
c.44T>A	p.(Leu15Gln)	Missense	Pro-peptide (Pro)	B	-7	BP4(Strong) BP6(Moderate) BP3(Supporting) PM2(Moderate)	Heterozygous	20031616
c.45+1G>A	p.?	Splicing site	Pro-peptide (Pro)	P	14	PVS1(Very Strong) PP5(Strong) PM2(Moderate)	Heterozygous	33684294
c.73_77delCACTT	p.(His25Thrfs*8)	Frameshift	Pro-peptide (Pro)	P	10	PVS1(Very Strong) PM2(Moderate)	Heterozygous	33684294
c.136C>T	p.(Arg46Trp)	Missense	Pro-peptide (Pro)	P	14	PP3(Strong) PP5(Strong) PM1(Moderate) PM5(Moderate) PM2(Moderate)	Heterozygous; Compound	29178656 / 30454721 / 25820315 / 20400443 / 30790397 / 2561645 / 31845994 / 24086444
c.137G>A	p.(Arg46Gln)	Missense	Pro-peptide (Pro)	P	18	PP5(Very Strong) PP3(Strong) PM1(Moderate) PM5(Moderate) PM2(Moderate)	Heterozygous; Compound; Digenic	20857253 / 25616645 / 20400443 / 23071725 / 16773573 / 20031616 / 23381804 / 20031617 / 30790397 / 21606396 / 31845994 / 21606396 / 21606390
c.143A>G	p.(Lys48Arg)	Missense	Pro-peptide (Pro)	VUS	5	PM1(Moderate) PM2(Moderate) PP3(Supporting)	Compound	16773573
c.144G>C	p.(Lys48Asn)	Missense	Pro-peptide (Pro)	LP	6	PM1(Moderate) PP3(Moderate) PM2(Moderate)	Heterozygous; Compound	30790397
c.146G>A	p.(Arg49His)	Missense	Pro-peptide (Pro)	P	18	PP5(Very Strong) PP3(Strong) PM1(Moderate) PM5(Moderate) PM2(Moderate)	Heterozygous; De novo; Compound	30790397 / 20857253 / 20400443 / 31845994 / 24086444 / 19151369 / 31645976 / 20031617 / 25616645 / 30454721
c.152G>C	p.(Trp51Ser)	Missense	Extracellular domain (EC1)	LP	9	PP3(Strong) PM1(Moderate) PM2(Moderate) PP5(Supporting)	Heterozygous; Digenic	35721821
c.166G>A	p.(Val56Met)	Missense	Extracellular domain (EC1)	B	-12	BS1(Strong) BS2(Strong) BP4(Moderate) BP6(Moderate)	Heterozygous; Digenic	20031617 / 20031616 / 17105751 / 19039334 / 20864495 /18678517 / 20857253 / 21606390
c.217-1G>T	p.?	Splicing site	Extracellular domain (EC1)	P	11	PP5(Very Strong) PP5(Supporting) PM2(Moderate)	Compound	30177324
c.217A>G	p.(Ile73Val)	Missense	Extracellular domain (EC1)	VUS	2	PM2(Moderate)	Heterozygous	20031616
c.260A>G	p.(Tyr87Cys)	Missense	Extracellular domain (EC1)	LP	6	PP3(Strong) PM2(Moderate)	Heterozygous	16505173 / 24070718
c.298G>C	p.(Gly100Arg)	Missense	Extracellular domain (EC1)	VUS	4	PP3(Strong) PM2(Supporting) BP1(Supporting)	Heterozygous	16505173 / 16774985 / 26138720 / 24070718
c.307_308del	p.(Val103Leufs*2)	Frameshift	Extracellular domain (EC1)	P	14	PVS1(Very Strong) PP5(Strong) PM2(Moderate)	Heterozygous	30454721
c.338T>C	p.(Val113Ala)	Missense	Extracellular domain (EC1)	VUS	1	BP4(Supporting) PM2(Moderate)	Heterozygous	30524916
c.355C>T	p.(Arg119*)	Nonsense	Extracellular domain (EC1)	P	12	PVS1(Very Strong) PP5(Moderate) PM2(Moderate)	Homozygous; Heterozygous; Compound; Digenic	39706847 33949662
c.356G>A	p.(Arg119Gln)	Missense	Extracellular domain (EC1)	VUS	3	PM2(Moderate) PP3(Supporting)	Compound	30454721
c.378+1G>T	p.?	Splicing site	Extracellular domain (EC1)	P	11	PVS1(Very Strong) PP5(Supporting) PM2(Moderate)	Compound	33917638
c.378+2T>G	p.?	Splicing site	Extracellular domain (EC1)	P	11	PVS1(Very Strong) PP5(Supporting) PM2(Mp)	Heterozygous	21606396 / 25616645
c.379-15A>G	p.?	Splicing site	Extracellular domain (EC1)	LB	-2	BP4(Strong) PM2(Moderate)	Heterozygous	30391969
c.404G>A	p.(Arg135Lys)	Missense	Extracellular domain (EC1)	VUS	0	BP4(Moderate) PM2(Moderate)	Heterozygous	30391969
c.430G>A	p.(Glu144Lys)	Missense	Extracellular domain (EC1)	VUS	2	PM2(Moderate)	Heterozygous	30391969
c.437G>A	p.(Arg146His)	Missense	Extracellular domain (EC1)	VUS	3	PM2(Moderate) PP3(Supporting)	Digenic	20152563 / 24070718
c.437G>T	p.(Arg146Leu)	Missense	Extracellular domain (EC1)	VUS	0	BP6(Moderate) PM2(Moderate)	Heterozygous; Digenic	20400443
c.445G>A	p.(Val149Ile)	Missense	Extracellular domain (EC1)	VUS	0	BP4(Moderate) PM2(Moderate)	Digenic	34012299
c.445G>T	p.(Val149Phe)	Missense	Extracellular domain (EC1)	LP	6	PP3(Strong) PM2(Moderate)	Heterozygous; Digenic	21606396 / 20031616
c.462C>A	p.(Asp154Glu)	Missense	Extracellular domain (EC1)	LP	6	PP3(Strong) PM2(Moderate)	Heterozygous	17105751 / 23071725 / 21606390
c.462C>G	p.(Asp154Glu)	Missense	Extracellular domain (EC1)	LP	6	PP3(Strong) PM2(Moderate)	Heterozygous	29062102 / 30885746 / 25213555
c.464_465insT	p.(Glu156Argfs*14)	Frameshift	Extracellular domain (EC1)	P	14	PVS1(Very Strong) PP5(Strong) PM2(Moderate)	Heterozygous	25616645
c.473T>G	p.(Val158Gly)	Missense	Extracellular domain (EC1)	B	-20	BP6(Very Strong) BS1(Strong) BS2(Strong) BP4(Strong)	Heterozygous; Compound; Digenic	21606390 / 17105751 / 19039334 / 33232181 / 23071725 / 20857253 / 21606396 / 20031616
c.523+1_523+2delGT	p.?	Splicing site	Extracellular domain (EC2)	P	14	PVS1(Very Strong) PP5(Strong) PM2(Moderate)	Heterozygous	33684294
c.523+1G>A	p.?	Splicing site	Extracellular domain (EC2)	P	14	PVS1(Very Strong) PP5(Strong) PM2(Moderate)	Heterozygous	30790397
c.523+2T>C	p.?	Splicing site	Extracellular domain (EC2)	P	14	PVS1(Very Strong) PP5(Strong) PM2(Moderate)	Heterozygous; Compound	33684294 / 25616645 / 33232181 / 30790397 / 20857253 / 20400443
c.524-3C>G	p.?	Splicing site	Extracellular domain (EC2)	LP	7	PP3(Strong) PM2(Moderate) PP5(Supporting)	Compound	30177324
c.560A>G	p.(Asp187Gly)	Missense	Extracellular domain (EC2)	LP	6	PP3(Strong) PM2(Moderate)	Heterozygous	23071725 / 30885746
c.581C>T	p.(Ser194Leu)	Missense	Extracellular domain (EC2)	VUS	2	PM2(Moderate)	Heterozygous; Compound	38375917 / 22214898
c.593A>G	p.(Tyr198Cys)	Missense	Extracellular domain (EC2)	VUS	4	PP3(Moderate) PM2(Moderate)	Heterozygous; Compound	27055156 / 30454721
c.614C>T	p.(Pro205Leu)	Missense	Extracellular domain (EC2)	VUS	3	PM2(Moderate) PP3(Supporting)	Heterozygous; Compound	21606396 / 25616645 / 20031616
c.689A>G	p.(Glu230Gly)	Missense	Extracellular domain (EC2)	VUS	5	PP3(Strong) PM2(Moderate)	Heterozygous; Compound	26138720 / 24070718
c.690+1G>A	p.?	Splicing site	Extracellular domain (EC2)	P	14	PVS1(Very Strong) PP5(Strong) PM2(Moderate)	Heterozygous	30790397 / 20400443 / 24086444
c.690+1G>T	p.?	Splicing site	Extracellular domain (EC2)	P	11	PVS1(Very Strong) PP5(Supporting) PM2(Moderate)	Heterozygous	30790397
c.710T>A	p.(Leu237*)	Nonsense	Extracellular domain (EC2)	P	10	PVS1(Very Strong) PM2(Moderate)	Digenic	31653443
c.716T>C	p.(Val239Ala)	Missense	Extracellular domain (EC2)	VUS	1	PM2 (Moderate) BP6 (Supporting)	Heterozygous	21606390
c.783T>A	p.(Arg261=)	Synonymous	Extracellular domain (EC2)	B	-11	BP6(Very Strong) BP4(Strong) BP7(Supporting) PM2(Moderate)	Heterozygous	21606396 /25087486
c.792T>A	p.(Asn264Glu)	Missense	Extracellular domain (EC2)	LP	6	PP3(Strong) PM2(Moderate)	Heterozygous	20400443 / 25213555 / 21606390
c.797A>G	p.(Asn266Ser)	Missense	Extracellular domain (EC2)	LP	6	PP3(Strong) PM2(Moderate)	Heterozygous	16505173 / 26138720 / 25213555 / 19635863 / 24070718
c.803A>T	p.(Asn268Ile)	Missense	Extracellular domain (EC2)	LP	6	PP3(Strong) PM2(Moderate)	Heterozygous	29178656
c.806T>C	p.(Ile269Thr)	Missense	Extracellular domain (EC2)	VUS	2	PM2(Moderate)	Heterozygous; Digenic	20400443
c.809C>G	p.(Pro270Arg)	Missense	Extracellular domain (EC2)	LP	6	PP3(Strong) PM2(Moderate)	Compound	30454721
c.828+13C>A	p.?	Splicing site	Extracellular domain (EC3)	LB	-2	BP4(Strong) PM2(Moderate)	Heterozygous	30391969
c.828+16C>A	p.?	Splicing site	Extracellular domain (EC3)	B	-16	BA1(Stand Alone) BP6(Very Strong) BP4(Strong)	Heterozygous	30391969
c.829_840del	p.(Leu277_Met280del)	Splicing site	Extracellular domain (EC3)	VUS	3	PM2(Moderate) PP5(Supporting)	Heterozygous	33684294 / 17105751 / 21606390
c.829-1_835del	p.(Leu277Glyfs*3)	Frameshift	Extracellular domain (EC3)	P	10	PVS1(Very Strong) PM2(Moderate)	Digenic	25616645 / 20031617 / 20857253
c.847G>A	p.(Glu283Lys)	Missense	Extracellular domain (EC3)	VUS	4	PP3(Strong) PM2(Supporting) BP1(Supporting)	Heterozygous	29178656
c.861C>T	p.(Asn287=)	Synonymous	Extracellular domain (EC3)	B	-21	BA1(Stand Alone) BP6(Very Strong) BP4(Strong) BP7(Supporting)	Heterozygous	30391969 / 18632414
c.874C>T	p.(Arg292Cys)	Missense	Extracellular domain (EC3)	VUS	4	PP3(Moderate) PM2(Moderate)	Homozygous; Heterozygous; Compound; Digenic	30454721 / 21606396 / 22214898 / 29178656 / 39155900 / 21606396 / 25616645 / 22000064
c.877A>G	p.(Ile293Val)	Missense	Extracellular domain (EC3)	B	-21	BA1(Stand Alone) BP6(Very Strong) BP4(Strong)	Heterozygous; Digenic	30391969 / 33232181 / 20864495 / 30716529
c.880A>G	p.(Lys294Glu)	Missense	Extracellular domain (EC3)	VUS	3	PP3(Moderate) PM2(Moderate)	Heterozygous	16505173 / 23071725 / 30885746 / 26138720 / 24070718 / 26138720
c.882_883insA	p.(Val295Serfs*6)	Frameshift	Extracellular domain (EC3)	P	14	PVS1(Very Strong) PP5(Strong) PM2(Moderate)	Heterozygous; Compound	20400443 / 30790397
c.883_884delGTinsTC	p.(Val295Ser)	Missense	Extracellular domain (EC3)	VUS	2	PM2(Moderate)	Compound	20400443
c.889G>A	p.(Asp297Asn)	Missense	Extracellular domain (EC3)	LP	6	PP3(Strong) PM2(Moderate)	Homozygous; Heterozygous; Compound	20031616 / 25616645 / 20857253 / 21606396 / 24070718
c.915T>A	p.(Asn305Lys)	Missense	Extracellular domain (EC3)	VUS	4	PP3(Moderate) PM2(Moderate)	Compound	16773573
c.918G>A	p.(Trp306*)	Nonsense	Extracellular domain (EC3)	P	14	PVS1(Very Strong) PP5(Strong) PM2(Moderate)	Compound	16773573 / 25616645 / 20857253 / 20031617
c.977A>T	p.(Asn326Val)	Missense	Extracellular domain (EC3)	LP	6	PP3(Strong) PM2(Moderate)	Heterozygous; Digenic	20400443 / 30790397
c.988A>G	p.(Asn330Asp)	Missense	Extracellular domain (EC3)	LP	6	PP3(Strong) PM2(Moderate)	Compound	18632414
c.998T>C	p.(Ile333Thr)	Missense	Extracellular domain (EC3)	VUS	4	PP3(Moderate) PM2(Moderate)	Heterozygous	22036071 / 21606390
c.991G>A	p.(Glu331Lys)	Missense	Extracellular domain (EC3)	LP	6	PP3(Strong) PM2(Moderate)	Heterozygous; Compound	16505173 / 24070718 / 26138720 / 21606390 / 30454721
c.1003A>G	p.(Thr335Ala)	Missense	Extracellular domain (EC3)	LB	-1	BP4(Moderate) BP6(Supporting) PM2(Moderate) PP5(Supporting)	Heterozygous; Homozygous; Digenic	21606390 / 23381804 / 21606396 / 28818065 / 33232181 / 20864495 / 30790397 / 20031617 / 20857253 / 21606396
c.1014+27G>A	p.?	Splicing site	Extracellular domain (EC3)	B	-14	BA1 (Stand Alone) BP4 (Strong) BP6 (Moderate)	Heterozygous	30391969
c.1034T>C	p.(Met345Thr)	Missense	Extracellular domain (EC3)	VUS	0	PM2(Moderate) BP4(Moderate)	Heterozygous	24070718
c.1038_1040del	p.(Lys346del)	Inframe	Extracellular domain (EC3)	VUS	4	PM4(Moderate) PM2(Moderate)	Heterozygous; Compound	31386562 / 20857253 / 27532257 / 21606390 / 25616645
c.1051A>G	p.(Ser351Gly)	Missense	Extracellular domain (EC3)	B	-20	BP6(Very Strong) BS1(Strong) BS2(Strong) BP4(Strong)	Heterozygous	21606390
c.1072G>A	p.(Ala358Thr)	Missense	Extracellular domain (EC3)	VUS	4	PM2(Moderate) PP3(Supporting) PP5(Supporting)	Heterozygous; Digenic	21636032 / 21606396 / 25616645
c.1088C>A	p.(Ser363*)	Nonsense	Extracellular domain (EC3)	P	11	PVS1(Very Strong) PM2(Moderate) PP5(Supporting)	Digenic	34202524
c.1107G>A	p.(Lys369=)	Synonymous	Extracellular domain (EC3)	LB	-3	BP4(Strong) BP7(Supporting) PM2(Moderate)	Heterozygous	30391969
c.1174G>A	p.(Val392Ile)	Missense	Extracellular domain (EC4)	B	-14	BS1(Strong) BS2(Strong) BP4(Strong) BP6(Strong)	Heterozygous; Digenic	17105751 / 20031616 / 23071725 / 29062102 / 30885746 / 26138720 / 24070718 / 21606396 / 30391969
c.1250_1253dup	p.(Asp419*)	Nonsense	Extracellular domain (EC4)	P	10	PVS1(Very Strong) PM2(Moderate)	Heterozygous	16505173 / 16774985 / 26138720 / 24070718
c.1303G>A	p.(Asp435Asn)	Missense	Extracellular domain (EC4)	B	-14	BS1(Strong) BS2(Strong) BP4(Strong) BP6(Strong)	Heterozygous; Digenic	21606396
c.1423+1G>T	p.?	Splicing site	Extracellular domain (EC4)	P	11	PVS1(Very Strong) PP5(Supporting) PM2(Moderate)	Compound	18632414
c.1423+2T>G	p.?	Splicing site	Extracellular domain (EC4)	P	10	PVS1(Very Strong) PM2(Moderate)	Heterozygous	25660657 / 25660657
c.1448G>A	p.(Gly483Asp)	Missense	Extracellular domain (EC4)	VUS	4	PP3(Strong) PM2(Supporting) BP1(Supporting)	Heterozygous; Compound	29178656
c.1478A>G	p.(Asn493Ser)	Missense	Extracellular domain (EC4)	VUS	3	PP3(Moderate) PM2(Moderate) BP6(Supporting)	Heterozygous	21606390
c.1480G>A	p.(Asp494Asn)	Missense	Extracellular domain (EC4)	VUS	4	PP3(Moderate) PM2(Moderate)	Heterozygous; Digenic	21606396 / 25616645 / 21606396 / 25213555
c.1481A>C	p.(Asp494Ala)	Missense	Extracellular domain (EC4)	VUS	3	PP3(Moderate) PM2(Moderate) BP6(Supporting)	Heterozygous; Homozygous	29178656 / 23514727
c.1520G>A	p.(Cys507Tyr)	Missense	Extracellular anchor domain (EA)	LP	7	PP3(Strong) PM2(Moderate) PP5(Supporting)	Heterozygous	16773573 / 20031617 / 20857253 / 25616645
c.1525G>A	p.(Asp509Asn)	Missense	Extracellular anchor domain (EA)	LB	-5	BP4(Strong) BP6(Moderate) BP3(Supporting) PM2(Moderate)	Heterozygous	29178656
c.1550C>T	p.(Ala517Val)	Missense	Extracellular anchor domain (EA)	B	-14	BP4(Strong) BP6(Moderate) BS1(Strong) BS2(Strong)	Heterozygous	25213555
c.1562A>G	p.(Asp521Gly)	Missense	Extracellular anchor domain (EA)	VUS	4	PP3(Moderate) PM2(Moderate)	Heterozygous; Compound	29178656
c.1592T>G	p.(Phe531Cys)	Missense	Extracellular anchor domain (EA)	LP	8	PP3(Strong) PP5(Moderate) PM2(Moderate)	Founder; Compound; Homozygous; Heterozygous; Digenic	30454721 / 35941102 / 30129429 / 29178656 / 39253717 / 30177324 / 31645976 / 30391969 / 28578331 / 24238504 / 2857833 / 18632414 / 23514727
c.1597G>A	p.(Val533Ile)	Missense	Extracellular anchor domain (EA)	B	-14	BP4(Strong) BP6(Moderate) BS1(Strong) BS2(Strong)	Heterozygous	29178656
c.1651+70T>C	p.?	Splicing site	Extracellular anchor domain (EA)	B	-14	BA1(Stand Alone) BP4(Strong) BP6(Moderate)	Heterozygous	30391969
c.1669C>T	p.(Gln557*)	Nonsense	Extracellular anchor domain (EA)	P	10	PVS1(Very Strong) PM2(Moderate)	Heterozygous	16774985
c.1672C>T	p.(Gln558*)	Nonsense	Extracellular anchor domain (EA)	P	11	PVS1(Very Strong) PP5(Supporting) PM2(Moderate)	Heterozygous	16505173 / 30304392
c.1696G>A	p.(Asp566Asn)	Missense	Extracellular anchor domain (EA)	VUS	1	PM2(Supporting) BP3(Supporting)	Digenic	21606396
c.1739G>C	p.(Cys580Ser)	Missense	Extracellular anchor domain (EA)	VUS	4	PP3(Moderate) PM2(Moderate)	Compound	30454721
c.1773_1774delTG	p.(Cys591*)	Nonsense	Extracellular anchor domain (EA)	P	12	PVS1(Very Strong) PP5(Moderate) PM2(Moderate)	Heterozygous	17105751 / 21606390
c.1880-1G>T	p.?	Splicing site	Transmembrane domain (TM)	P	10	PVS1(Very Strong) PM2(Moderate)	Heterozygous	29178656
c.1880-2A>G	p.?	Splicing site	Transmembrane domain (TM)	P	14	PVS1(Very Strong) PP5(Strong) PM2(Moderate)	Heterozygous; Compound	16505173 / 33684294 / 24070718 / 26138720
c.1912G>C	p.(Gly638Arg)	Missense	Transmembrane domain (IA)	VUS	4	PP3(Moderate) PM2(Moderate)	Heterozygous	29566126 / 24070718 / 26138720
c.1919_1932del	p.(Gly640Aspfs*15)	Frameshift	Transmembrane domain (IA)	P	11	PVS1(Very Strong) PM2(Moderate) PP5(Supporting)	Heterozygous; Compound	20400443 / 30790397
c.2032G>A	p.(Gly678Arg)	Missense	Transmembrane domain (IA)	LB	-3	BP4(Strong) BP3(Supporting) PM2(Moderate)	Heterozygous	26296472
c.2033G>C	p.(Gly678Ala)	Missense	Transmembrane domain (IA)	LB	-4	BP4(Strong) BP3(Supporting) BP6(Supporting) PM2(Moderate)	Heterozygous	26138720 / 24070718
c.2036delG	p.(Gly679Alafs*3)	Frameshift	Transmembrane domain (IA)	P	10	PVS1(Very Strong) PM2(Moderate)	Heterozygous	16505173
c.2137G>A	p.(Glu713Lys)	Missense	Cytoplasmic Domain (ICS)	B	-21	BA1(Stand Alone) BP6(Very Strong) BP4(Strong) BP3(Supporting)	Heterozygous	16774985 / 20031616 / 21606396 / 18632414 / 30391969 / 20864495
c.2158G>T	p.(Glu720*)	Nonsense	Cytoplasmic Domain (ICS)	P	10	PVS1(Very Strong) PM2(Moderate)	Homozygous	30790397
c.2194T>G	p.(Phe732Val)	Missense	Cytoplasmic Domain (ICS)	LB	-3	BP4(Strong) BP3(Supporting) PM2(Moderate)	Heterozygous	21606396
c.2315T>G	p.(Leu772*)	Nonsense	Cytoplasmic Domain (ICS)	P	11	PVS1(Very Strong) PP5(Supporting) PM2(Moderate)	Compound	33917638
c.2318G>A	p.(Arg773Lys)	Missense	Cytoplasmic Domain (ICS)	B	-20	BA1(Stand Alone) BP6(Very Strong) BP4(Strong)	Heterozygous; Compound	23381804 / 33917638 / 30391969 / 20864495 / 33917638 / 18632414
c.2358delA	p.(Asp787Metfs*21)	Frameshift	Cytoplasmic Domain (ICS)	P	11	PVS1(Very Strong) PM2(Moderate) PP5(Supporting)	Homozygous; Heterozygous	36843528 /34300226
c.2434G>A	p.(Gly812Ser)	Missense	Proline-rich linker (LD)	VUS	4	PM5(Moderate) PM2(Moderate)	Heterozygous	25213555 / 25616645
c.2434G>T	p.(Gly812Cys)	Missense	Proline-rich linker (LD)	LP	8	PP3(Strong) PP5(Moderate) PM2(Moderate)	Heterozygous	16773573 / 20031617 / 20857253 / 25213555 / 25616645 / 20708101
c.2437T>C	p.(Cys813Arg)	Missense	Proline-rich linker (LD)	LP	6	PP3(Strong) PM2(Moderate)	Heterozygous	20708101 / 25213555
c.2491C>T	p.(Leu831Phe)	Missense	Proline-rich linker (LD)	LB	-2	BP4(Strong) PM2(Moderate)	Heterozygous	26138720 / 29038103 / 24070718
c.2499_2500delCAinsT	p.(Lys834Argfs*3)	Frameshift	Cytoplasmic Domain (ICS)	P	11	PVS1(Very Strong) PM2(Moderate) PP5(Supporting)	Homozygous	30790397
c.2505A>G	p.(Thr835=)	Synonymous	Proline-rich linker (LD)	B	-21	BA1(Stand Alone) BP6(Very Strong) BP4(Strong) BP7(Supporting)	Heterozygous	30391969 / 18632414
c.2533delA	p.(Ile845*)	Nonsense	Cytoplasmic Domain (RUD)	P	14	PVS1(Very Strong) PP5(Strong) PM2(Moderate)	Heterozygous	33684294
c.2536G>A	p.(Asp846Asn)	Missense	Cytoplasmic Domain (RUD)	LB	-2	BP4(Strong) PM2(Moderate)	Heterozygous	29178656
c.2573C>T	p.(Ala858Val)	Missense	Cytoplasmic Domain (RUD)	LB	-4	BP4(Strong) BP3(Supporting) PM2(Moderate) PP5(Supporting)	Heterozygous	26296472
c.2623A>G	p.(Met875Val)	Missense	Cytoplasmic Domain (RUD)	LB	-3	BP4(Strong) BP3(Supporting) PM2(Moderate)	Heterozygous; Digenic	33057194 / 35982159 / 21606396
c.2647T>C	p.(Ser883Pro)	Missense	Cytoplasmic Domain (RUD)	B	-21	BP6(Very Strong) BS1(Strong) BS2(Strong) BP4(Strong) BP3(Supporting)	Heterozygous	26220970
c.2648C>T	p.(Ser883Phe)	Missense	Cytoplasmic Domain (RUD)	LB	-4	BP4(Strong) BP3(Supporting) BP6(Supporting) PM2(Moderate)	Heterozygous	20857253
c.2681T>G	p.(Leu894Trp)	Missense	Cytoplasmic Domain (RUD)	LB	-1	BP4(Moderate) BP3(Supporting) PM2(Moderate)	Heterozygous	29178656
c.2686G>A	p.(Glu896Lys)	Missense	Cytoplasmic Domain (RUD)	LB	-1	BP4(Moderate) BP3(Supporting) PM2(Moderate)	Heterozygous	26296472
c.2708C>T	p.(Thr903Ile)	Missense	Cytoplasmic Domain (RUD)	B	-21	BP6(Very Strong) BS1(Strong) BS2(Strong) BP4(Strong) BP3(Supporting)	Heterozygous	33232181
c.2780C>T	p.(Pro927Leu)	Missense	Cytoplasmic Domain (RUD)	B	-14	BP4(Strong) BP6(Moderate) BP3(Supporting) BS1(Strong) BS2(Strong)	Heterozygous	23514727 / 29178656 / 30454721
c.2759T>G	p.(Val920Gly)	Missense	Cytoplasmic Domain (RUD)	B	-21	BP6(Very Strong) BS1(Strong) BS2(Strong) BP4(Strong) BP3(Supporting)	Heterozygous; Digenic	21606390 / 17105751 / 19039334 / 20864495 / 25213555 / 18678517 /25087486 / 21606396
c.2761_2764dupGCTA	p.(Thr922Serfs*6)	Frameshift	Cytoplasmic Domain (RUD)	P	14	PVS1(Very Strong) PP5(Strong) PM2(Moderate)	Heterozygous	33684294
c.2773C>T	p.(Pro925Ser)	Missense	Cytoplasmic Domain (RUD)	VUS	1	PM2(Moderate) BP3(Supporting)	Heterozygous	24070718 / 26138720
c.2923delG	p.(Val975*)	Nonsense	Cytoplasmic Domain (RUD)	P	10	PVS1(Very Strong) PM2(Moderate)	Heterozygous	33684294
c.2979G>T	p.(Gln993His)	Missense	Cytoplasmic Domain (RUD)	VUS	1	BP3(Supporting) BP4 (Supporting) PM2(Moderate) PM5(Supporting)	De novo	34438094
c.2990delG	p.(Gly997Valfs*20)	Frameshift	Cytoplasmic Domain (RUD)	P	14	PVS1(Very Strong) PP5(Strong) PM2(Moderate)	Heterozygous	23128240 / 26138720 /24070718
c.3059_3062del	p.(Glu1020Alafs*18)	Frameshift	Cytoplasmic Domain (RUD)	P	10	PVS1(Strong) PP5(Strong) PM2(Moderate)	Heterozygous; Digenic	34263121 / 21397041 / 20864495 / 23381804
c.3075_3076insC	p.(Ser1026Glnfs*12)	Frameshift	Cytoplasmic Domain (RUD)	LP	6	PVS1(Strong) PM2(Moderate)	Heterozygous	26296472
c.3118G>A	p.(Val1040Ile)	Missense	Cytoplasmic Domain (RUD)	B	-11	BP4(Strong) BP6(Very Strong) BP3(Supporting) PM2(Moderate)	Heterozygous	29178656
c.3140C>G	p.(Thr1047Arg)	Missense	Cytoplasmic Domain (RUD)	VUS	2	PM2(Moderate)	Heterozygous	20857253 / 25616645
c.3167C>T	p.(Thr1056Ile)	Missense	Glycine-rich terminal domain (TD)	LB	-1	BP4(Moderate) BP3(Supporting) PM2(Moderate)	Heterozygous	21606390
c.3175T>A	p.(Ser1059Thr)	Missense	Glycine-rich terminal domain (TD)	LB	-5	BP4(Strong) BP6(Moderate) BP3(Supporting) PM2(Moderate)	Homozygous	17372169
c.3199A>G	p.(Asn1067Asp)	Missense	Glycine-rich terminal domain (TD)	LB	-3	BP4(Strong) BP3(Supporting) PM2(Moderate)	Heterozygous	20031616
c.3247G>A	p.(Gly1083Ser)	Missense	Glycine-rich terminal domain (TD)	VUS	2	PM2(Moderate)	Compound	20031616
c.3321T>C	p.(Val1107=)	Synonymous	Glycine-rich terminal domain (TD)	B	-21	BA1(Stand Alone) BP6(Very Strong) BP4(Strong) BP7(Supporting)	Heterozygous	30391969 / 18632414
Deletion ex 2-14	CNVs	Frameshift	Pro-peptide (Pro)	P			Compound	29038103
