# Supplementary material for: Desmoglein-2 related Arrhythmogenic Cardiomyopathy: Integrative Genomic and Literature-based analysis with an Italian cohort-Level Validation
Source: Research Square preprint supplement (doi:10.21203/rs.3.rs-6957155/v1), 2025-08-27
Supplement: Supplementary file 2 [file 5ab1d6cbca0b42cb3d7dc65e.xlsx]

## Sheet: Padua cohort
			Supplementary table S3: List of DSG2 variants found in Padua cohort
Cohort_ID	Gender	Proband_Status	cDNA coordinate	Protein coordinate	Type of variants	Domain	Criteria	Points	ACMG Class	Zygosity
PD1	1	1	c.3G>A	p.(Met1Ile)	Missense	Pro-peptide (Pro)	PVS1(Very Strong) PP5(Moderate) PM2(Moderate) PS3(Supporting)	13	P	Heterozygous
PD2	1	1	c.216+2T>C	p.?	Splicing site	Extracellular domain (EC1)	PVS1(Very Strong) PM2(Moderate)	10	P	Heterozygous
PD3	1	1	c.260A>G	p.(Tyr87Cys)	Missense	Extracellular domain (EC1)	PP3(Strong) PM2(Moderate)	6	LP	Heterozygous
PD4	1	1	c.260A>G	p.(Tyr87Cys)	Missense	Extracellular domain (EC1)	PP3(Strong) PM2(Moderate)	6	LP	Heterozygous
PD5	0	1	c.378+2T>G	p.?	Splicing site	Extracellular domain (EC1)	PVS1(Very Strong), PP5(Supporting) PM2(Moderate)	11	P	Heterozygous
PD6	1	1	c.391G>A and c.1072G>A	p.(Ala131Thr) and p.(Ala358Thr)	Missense and Missense	Extracellular domain (EC1) and Extracellular domain (EC3)	PM2(Moderate) PP3(Moderate) AND PP3(Supporting) PP5(Supporting) PM2(Moderate)	4;4	VUS; VUS	Compound
PD7	0	1	c.689A>G and c.890A>G	p.(Glu230Gly) and p.(Asp297Gly)	Missense and Missense	Extracellular domain (EC2) and Extracellular domain (EC2)	PP3(Strong) PM2(Moderate) and PP3(Strong) PM2(Moderate)	6;6	LP;LP	Compound
PD8	1	1	c.704A>G	p.(Tyr235Cys)	Missense	Extracellular domain (EC2)	PP3(Strong) PM2(Moderate)	6	LP	Heterozygous
PD9	0	1	c.727G>T	p.(AspD243Tyr)	Missense	Extracellular domain (EC2)	PP3(Strong) PM2(Moderate)	6	LP	Heterozygous
PD10	1	1	c.797A>G	p.(Asn266Ser)	Missense	Extracellular domain (EC2)	PP3(Strong) PM2(Moderate)	6	LP	Heterozygous
PD11	0	1	c.797A>G	p.(Asn266Ser)	Missense	Extracellular domain (EC2)	PP3(Strong) PM2(Moderate)	6	LP	Heterozygous
PD12	1	1	c.797A>G	p.(Asn266Ser)	Missense	Extracellular domain (EC2)	PP3(Strong) PM2(Moderate)	6	LP	Heterozygous
PD13	0	1	c.797A>G	p.(Asn266Ser)	Missense	Extracellular domain (EC2)	PP3(Strong) PM2(Moderate)	6	LP	Heterozygous
PD14	1	1	c.847_849del	p.(Glu283del)	Deletion	Extracellular domain (EC3)	PM4(Moderate) PM2(Moderate)	4	VUS	Homozygous
PD15	1	1	c.1003A>G	p.(Thr335Ala)	Missense	Extracellular domain (EC3)	PP5(Supporting) PM2(Moderate) BP4(Moderate) BP6(Supporting)	-1	LB	Homozygous
PD16	1	1	c.1520G>T	p.(Cys507Phe)	Missense	Transmembrane (EA)	PP3(Strong) PM5(Moderate) PM2(Moderate)	8	LP	Heterozygous
PD17	1	1	c.1557C>A	p.(Asp519Glu)	Missense	Transmembrane (EA)	PP3(Moderate) PM2(Moderate)	4	VUS	Heterozygous
PD18	1	1	c.1557C>A	p.(Asp519Glu)	Missense	Transmembrane (EA)	PP3(Moderate) PM2(Moderate)	4	VUS	Heterozygous
PD19	0	1	c.1652-1G>T	p.?	Splicing site	Transmembrane (EA)	PVS1(Very Strong) PM2(Moderate)	10	P	Heterozygous
PD20	1	1	c.1652-1G>T	p.?	Splicing site	Transmembrane (EA)	PVS1(Very Strong) PM2(Moderate)	10	P	Heterozygous
PD21	1	1	c.1652-1G>T	p.?	Splicing site	Transmembrane (EA)	PVS1(Very Strong) PM2(Moderate)	10	P	Heterozygous
PD22	1	1	c.1652-1G>T	p.?	Splicing site	Transmembrane (EA)	PVS1(Very Strong) PM2(Moderate)	10	P	Heterozygous
PD23	1	1	c.1652-1G>T	p.?	Splicing site	Transmembrane (EA)	PVS1(Very Strong) PM2(Moderate)	10	P	Heterozygous
PD24	0	1	c.1667T>C	p.(Leu556Pro)	Missense	Transmembrane (EA)	PP3(Moderate) PM2(Moderate)	4	VUS	Heterozygous
PD25	1	1	c.1672C>T	p.(Gln558*)	Nonsense	Transmembrane (EA)	PVS1(Very Strong) PP5(Supporting) PM2(Moderate)	11	P	Heterozygous
PD26	0	1	c.1672C>T	p.(Gln558*)	Nonsense	Transmembrane (EA)	PVS1(Very Strong) PP5(Supporting) PM2(Moderate)	11	P	Homozygous
PD27	1	1	c.2032del	p.(Gly679Alafs*314)	Frameshift	Intercellular anchor (IA)	PVS1(Very Strong) PM2(Moderate)	10	P	Heterozygous
PD28	1	1	c.2322delT	p.(Tyr775Ilefs*33)	Frameshift	Cadherin typical intercellular segment (ICS)	PVS1(Very Strong) PM2(Moderate)	10	P	Heterozygous
PD29	1	1	c.2410delA	p.(Thr804Leufs*4)	Frameshift	Cadherin typical intercellular segment (ICS)	PVS1(Very Strong) PM2(Moderate)	10	P	Homozygous
PD30	0	1	c.2434G>T	p.(Gly812Cys)	Missense	Proline-rich linker (LD)	PP3(Strong) PP5(Moderate) PM2(Moderate)	8	LP	Heterozygous
PD31	1	1	c.2434G>A	p.(Gly812Ser)	Missense	Proline-rich linker (LD)	PP5(Moderate) PM2(Moderate)	4	VUS	Heterozygous
PD32	0	1	c.2551del	p.(Ile851Leufs*13)	Frameshift	Proline-rich linker (LD)	PVS1(Very Strong) PP5(Strong) PM2(Moderate)	14	P	Heterozygous
PD33	1	1	c.2645dup	p.(Tyr882*)	Nonsense	Repeat unit domain (RUD)	PVS1(Very Strong) PM2(Moderate)	10	P	Heterozygous
PD34	1	1	c.2990del	p.(Gly997Valfs*20)	Frameshift	Repeat unit domain (RUD)	PVS1(Very Strong) PP5(Strong) PM2(Moderate)	14	P	Heterozygous
PD35	1	1	c.298G>C and c.3059_3062delAGAG	p.(Gly100Arg) and p.(Glu1020Alafs*18)	Missense and Frameshift	Extracellular domain (EC1); Repeat unit domain (RUD)	PP3(Strong) PM2(Moderate) PS4(Supporting) AND PVS1(Very Strong) PP5(Strong) PM2(Moderate)	6;10	LP;P	Compound
PD36	1	1	c.298G>C and c.3059_3062delAGAG	p.(Gly100Arg) and p.(Glu1020Alafs*18)	Missense and Frameshift	Extracellular domain (EC1); Repeat unit domain (RUD)	PP3(Strong) PM2(Moderate) PS4(Supporting) AND PVS1(Very Strong) PP5(Strong) PM2(Moderate)	6;10	LP;P	Compound
PD37	1	1	c.298G>C and c.3059_3062delAGAG	p.(Gly100Arg) and p.(Glu1020Alafs*18)	Missense and Frameshift	Extracellular domain (EC2) + Glycine-rich terminal domain (TD)	PP3(Strong) PM2(Moderate) PS4(Supporting) AND PVS1(Very Strong) PP5(Strong) PM2(Moderate)	6;10	LP;P	Compound
PD38	1	1	c.298G>C and c.3059_3062delAGAG	p.(Gly100Arg) and p.(Glu1020Alafs*18)	Missense and Frameshift	Repeat unit domain (RUD)	PVS1(Strong) PP5(Strong) PM2(Moderate)	6;10	LP;P	Compound
PD39	0	1	c.3059_3062delAGAG	p.(Glu1020Alafs*18)	Frameshift	Repeat unit domain (RUD)	PVS1(Strong) PP5(Strong) PM2(Moderate)	10	P	Heterozygous
PD40	1	1	c.3059_3062delAGAG	p.(Glu1020Alafs*18)	Frameshift	Glycine-rich terminal domain (TD)	PVS1(Strong) PP5(Strong) PM2(Moderate)	10	P	Heterozygous
PD41	1	1	c.3059_3062delAGAG	p.(Glu1020Alafs*18)	Frameshift	Glycine-rich terminal domain (TD)	PVS1(Strong) PP5(Strong) PM2(Moderate)	10	P	Heterozygous
PD42	0	1	c.3059_3062delAGAG	p.(Glu1020Alafs*18)	Frameshift	Glycine-rich terminal domain (TD)	PVS1(Strong) PP5(Strong) PM2(Moderate)	10	P	Heterozygous
PD43	1	1	c.1250_1253dup	p.(Asp419*)	Nonsense	Extracellular domain (EC4)	PVS1(Very Strong) PM2(Moderate)	10	P	Heterozygous
PD44	1	1	c.1250_1253dup	p.(Asp419*)	Nonsense	Extracellular domain (EC4)	PVS1(Very Strong) PM2(Moderate)	10	P	Heterozygous
PD45	1	1	DEL:DSG2+DSC2	CNVs	Frameshift	ALL			P	Heterozygous
PD46	1	1	DUP:DSG2+DSC2	CNVs	Frameshift	ALL			P	Heterozygous
PD47	1	0	c.3G>A	p.(Met1Ile)	Start Loss	Pro-peptide (Pro)	PVS1(Very Strong) PP5(Moderate) PM2(Moderate) PS3(Supporting)	13	P	Heterozygous
PD48	0	0	c.3G>A	p.(Met1Ile)	Start Loss	Pro-peptide (Pro)	PVS1(Very Strong) PP5(Moderate) PM2(Moderate) PS3(Supporting)	13	P	Heterozygous
PD49	0	0	c.391G>A	p.(Ala131Thr)	Missense	Extracellular domain (EC3)	PP3(Moderate) PM2(Moderate)	4	VUS	Heterozygous
PD50	1	0	c.689A>G	p.(Glu230Gly)	Missense	Extracellular domain (EC2)	PP3(Strong) PM2(Moderate)	6	LP	Heterozygous
PD51	0	0	c.689A>G	p.(Glu230Gly)	Missense	Extracellular domain (EC2)	PP3(Strong) PM2(Moderate)	6	LP	Heterozygous
PD52	1	0	c.689A>G and c.890A>G	p.(Glu230Gly) and p.(Asp297Gly)	Missense and Missense	Extracellular domain (EC2), extracellular domain (EC2)	PP3(Strong) PM2(Moderate) and PP3(Strong) PM2(Moderate)	6;6	LP;LP	Compound
PD53	0	0	c.727G>T	p.(Asp243Tyr)	Missense	Extracellular domain (EC2)	PP3(Strong) PM2(Moderate)	6	LP	Heterozygous
PD54	0	0	c.727G>T	p.(Asp243Tyr)	Missense	Extracellular domain (EC2)	PP3(Strong) PM2(Moderate)	6	LP	Heterozygous
PD55	0	0	c.797A>G	p.(Asn266Ser)	Missense	Extracellular domain (EC2)	PP3(Strong) PM2(Moderate)	6	LP	Heterozygous
PD56	0	0	c.797A>G	p.(Asn266Ser)	Missense	Extracellular domain (EC2)	PP3(Strong) PM2(Moderate)	6	LP	Heterozygous
PD57	1	0	c.797A>G	p.(Asn266Ser)	Missense	Extracellular domain (EC2)	PP3(Strong) PM2(Moderate)	6	LP	Heterozygous
PD58	0	0	c.797A>G	p.(Asn266Ser)	Missense	Extracellular domain (EC2)	PP3(Strong) PM2(Moderate)	6	LP	Heterozygous
PD59	0	0	c.797A>G	p.(Asn266Ser)	Missense	Extracellular domain (EC2)	PP3(Strong) PM2(Moderate)	6	LP	Heterozygous
PD60	0	0	c.797A>G	p.(Asn266Ser)	Missense	Extracellular domain (EC2)	PP3(Strong) PM2(Moderate)	6	LP	Heterozygous
PD61	1	0	c.797A>G	p.(Asn266Ser)	Missense	Extracellular domain (EC2)	PP3(Strong) PM2(Moderate)	6	LP	Heterozygous
PD62	0	0	c.797A>G	p.(Asn266Ser)	Missense	Extracellular domain (EC2)	PP3(Strong) PM2(Moderate)	6	LP	Heterozygous
PD63	0	0	c.1003A>G	p.(Thr335Ala)	Missense	Extracellular domain (EC3)	PP5(Supporting) PM2(Moderate) BP4(Moderate) BP6(Supporting)	-1	LB	Heterozygous
PD64	1	0	c.1003A>G	p.(Thr335Ala)	Missense	Extracellular domain (EC3)	PP5(Supporting) PM2(Moderate) BP4(Moderate) BP6(Supporting)	-1	LB	Heterozygous
PD65	1	0	c.1072G>A	p.(Ala358Thr)	Missense	Extracellular domain (EC1)	PP3(Supporting) PP5(Supporting) PM2(Moderate)	4	VUS	Heterozygous
PD66	0	0	c.1250_1253dup	p.(Asp419*)	Nonsense	Extracellular domain (EC4)	PVS1(Very Strong) PM2(Moderate)	10	P	Heterozygous
PD67	0	0	c.1250_1253dup	p.(Asp419*)	Nonsense	Extracellular domain (EC4)	PVS1(Very Strong) PM2(Moderate)	10	P	Heterozygous
PD68	0	0	c.1250_1253dup	p.(Asp419*)	Nonsense	Extracellular domain (EC4)	PVS1(Very Strong) PM2(Moderate)	10	P	Heterozygous
PD69	0	0	c.1250_1253dup	p.(Asp419*)	Nonsense	Extracellular domain (EC4)	PVS1(Very Strong) PM2(Moderate)	10	P	Heterozygous
PD70	1	0	c.1520G>T	p.(Cys507Phe)	Missense	Transmembrane (EA)	PP3(Strong) PM5(Moderate) PM2(Moderate)	8	LP	Heterozygous
PD71	1	0	c.1520G>T	p.(Cys507Phe)	Missense	Transmembrane (EA)	PP3(Strong) PM5(Moderate) PM2(Moderate)	8	LP	Heterozygous
PD72	1	0	c.1520G>T	p.(Cys507Phe)	Missense	Transmembrane (EA)	PP3(Strong) PM5(Moderate) PM2(Moderate)	8	LP	Heterozygous
PD73	0	0	c.1557C>A	p.(Asp519Glu)	Missense	Transmembrane (EA)	PP3(Moderate) PM2(Moderate)	4	VUS	Heterozygous
PD74	0	0	c.1557C>A	p.(Asp519Glu)	Missense	Transmembrane (EA)	PP3(Moderate) PM2(Moderate)	4	VUS	Heterozygous
PD75	0	0	c.1652-1G>T	p.?	Splicing site	Transmembrane (EA)	PVS1(Very Strong) PM2(Moderate)	10	P	Heterozygous
PD76	0	0	c.1652-1G>T	p.?	Splicing site	Transmembrane (EA)	PVS1(Very Strong) PM2(Moderate)	10	P	Heterozygous
PD77	1	0	c.1652-1G>T	p.?	Splicing site	Transmembrane (EA)	PVS1(Very Strong) PM2(Moderate)	10	P	Heterozygous
PD78	1	0	c.1652-1G>T	p.?	Splicing site	Transmembrane (EA)	PVS1(Very Strong) PM2(Moderate)	10	P	Heterozygous
PD79	0	0	c.1652-1G>T	p.?	Splicing site	Transmembrane (EA)	PVS1(Very Strong) PM2(Moderate)	10	P	Heterozygous
PD80	1	0	c.1672C>T	p.(Gln558*)	Nonsense	Transmembrane (EA)	PVS1(Very Strong) PP5(Supporting) PM2(Moderate)	11	P	Heterozygous
PD81	0	0	c.1672C>T	p.(Gln558*)	Nonsense	Transmembrane (EA)	PVS1(Very Strong) PP5(Supporting) PM2(Moderate)	11	P	Heterozygous
PD82	1	0	c.2032del	p.(Gly679Alafs*314)	Frameshift	Intercellular anchor (IA)	PVS1(Very Strong) PM2(Moderate)	10	P	Heterozygous
PD83	0	0	c.2032del	p.(Gly679Alafs*314)	Frameshift	Intercellular anchor (IA)	PVS1(Very Strong) PM2(Moderate)	10	P	Heterozygous
PD84	0	0	c.2434G>T	p.(Gly812Cys)	Missense	Proline-rich linker (LD)	PP3-S, PM5(Moderate) PM2(Moderate)	8	LP	Heterozygous
PD85	0	0	c.2410delA	p.(Thr804Leufs*4)	Frameshift	Cadherin typical intercellular segment (ICS)	PVS1(Very Strong) PM2(Moderate)	10	P	Heterozygous
PD86	1	0	c.2410delA	p.(Thr804Leufs*4)	Frameshift	Cadherin typical intercellular segment (ICS)	PVS1(Very Strong) PM2(Moderate)	10	P	Heterozygous
PD87	1	0	c.2551del	p.(Ile851Leufs*13)	Frameshift	Proline-rich linker (LD)	PVS1(Very Strong) PP5(Strong) PM2(Moderate)	14	P	Heterozygous
PD88	0	0	c.2551del	p.(Ile851Leufs*13)	Frameshift	Proline-rich linker (LD)	PVS1(Very Strong) PP5(Strong) PM2(Moderate)	14	P	Heterozygous
PD89	0	0	c.2551del	p.(Ile851Leufs*13)	Frameshift	Proline-rich linker (LD)	PVS1(Very Strong) PP5(Strong) PM2(Moderate)	14	P	Heterozygous
PD90	0	0	c.298G>C and c.3059_3062delAGAG	p.(Gly100Arg)and p.(Glu1020Alafs*18)	Missense and Frameshift	Extracellular domain (EC1); Repeat unit domain (RUD)	PP3 strong, PM2(Moderate) AND PVS1(Strong) PP5(Moderate) PM2(Moderate)	6;8	LP;LP	Compound
PD91	1	0	c.298G>C and c.3059_3062delAGAG	p.(Gly100Arg)and p.(Glu1020Alafs*18)	Missense and Frameshift	Extracellular domain (EC1); Repeat unit domain (RUD)	PP3 strong, PM2(Moderate) AND PVS1(Strong) PP5(Moderate) PM2(Moderate)	6;8	LP;LP	Compound
PD92	0	0	c.3059_3062delAGAG	p.(Glu1020Alafs*18)	Frameshift	Repeat unit domain (RUD)	PVS1 (Strong) PP5(Moderate) PM2(Moderate)	8	LP	Heterozygous
PD93	1	0	c.3059_3062delAGAG	p.(Glu1020Alafs*18)	Frameshift	Repeat unit domain (RUD)	PVS1 (Strong) PP5(Moderate) PM2(Moderate)	8	LP	Heterozygous
PD94	0	0	c.3059_3062delAGAG	p.(Glu1020Alafs*18)	Frameshift	Repeat unit domain (RUD)	PVS1 (Strong) PP5(Moderate) PM2(Moderate)	8	LP	Heterozygous
PD95	0	0	DEL:DSG2+DSC2	CNVs	Frameshift	ALL			P	Heterozygous
